# Supplementary material
Source: Springer Nature journal article supplement (https://www.springerprofessional.de/resource/supplementary/13173_2013_9_MOESM11_ESM.pdf/11897010)

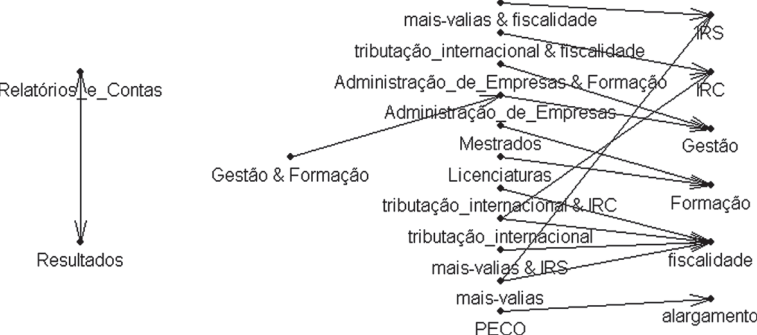

Supplement: MOESM11 [file 11897010]
